# Supplementary material for: Theoretical insights into the adsorption and gas sensing performance of Fe/Cu-adsorbed graphene
Source: Royal Society of Chemistry journal article supplement (doi:10.1039/d4cp00561a), 2024-01-01
Supplement: d4cp00561a1.pdf [file d4cp00561a1.pdf]

## Supporting information

### THEORETICAL INSIGHTS INTO THE ADSORPTION AND GAS SENSING PERFORMANCE OF Fe/Cu-ADSORBED GRAPHENE

Nguyen Ngoc Tri<sup>1,\*</sup>, Dai Q. Ho<sup>1,2</sup>, Nguyen Tien Trung<sup>1,\*</sup>

<sup>1</sup>Lab of Computational Chemistry and Modelling (LCCM), Faculty of Natural Sciences, Quy Nhon  
University, Vietnam

<sup>2</sup>Department of Materials Science and Engineering, University of Delaware, USA

\*-Corresponding authors, Email: nguyenngoctri@qnu.edu.vn, nguyentientrung@qnu.edu.vn

#### Figures:

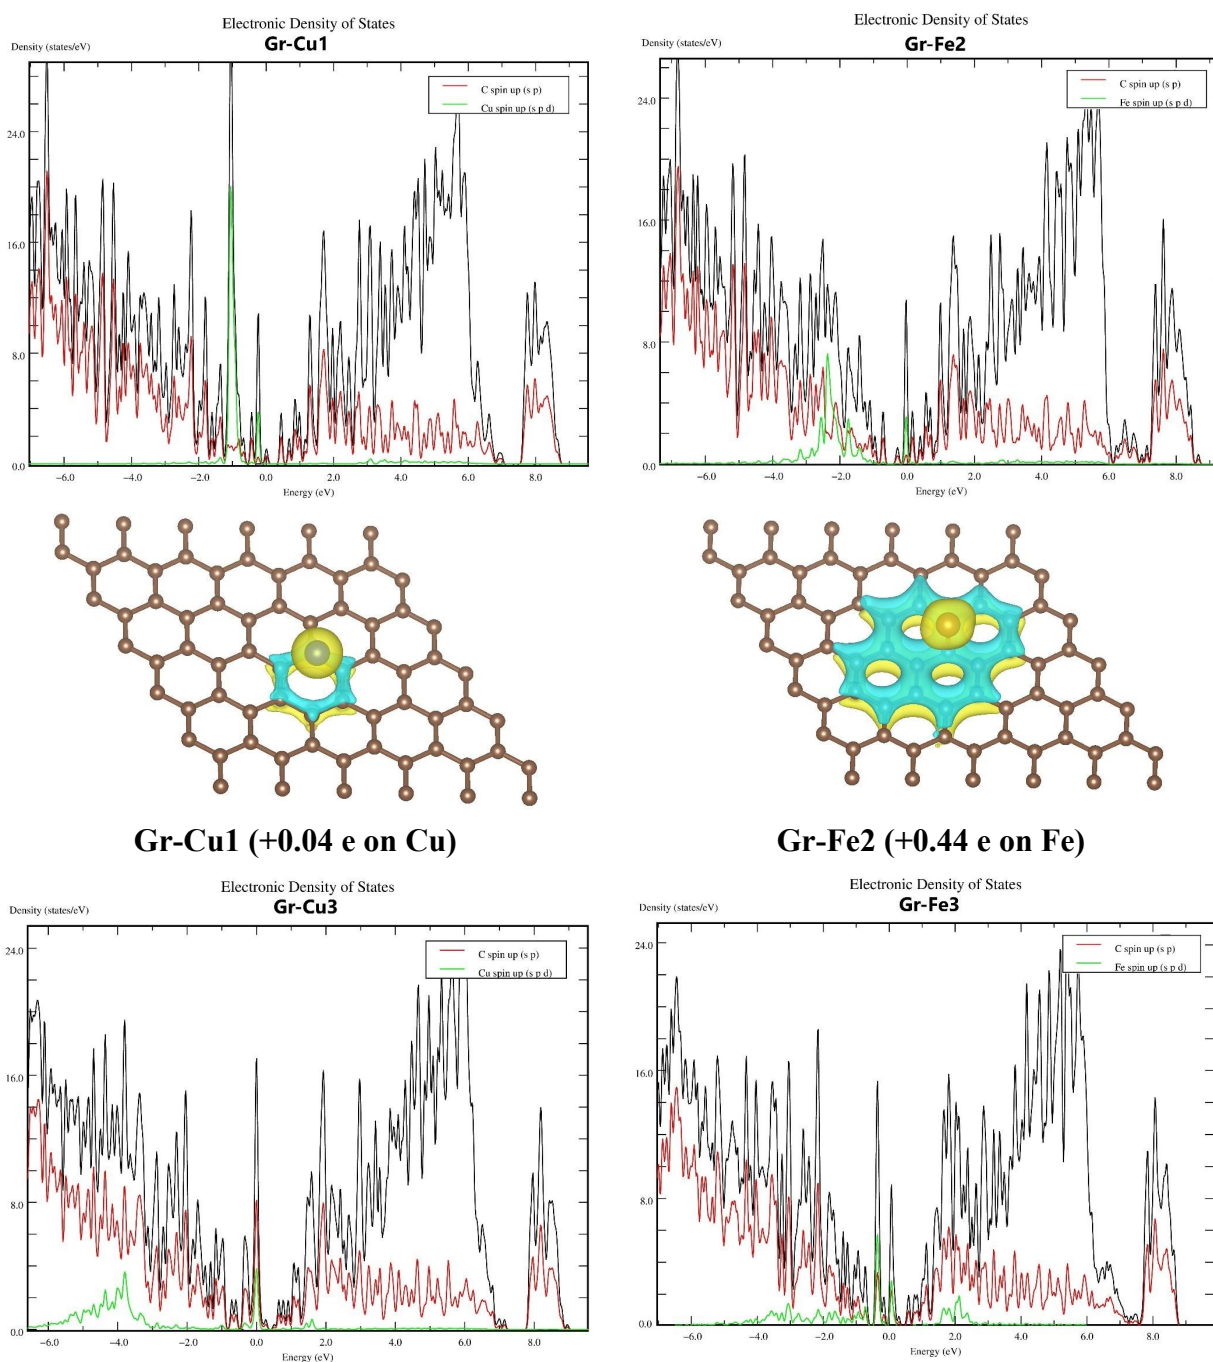

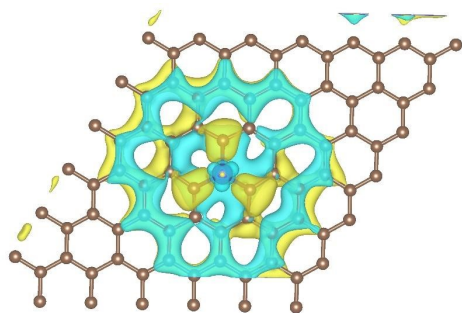

**Gr-Cu3 (+0.62 e on Cu)**

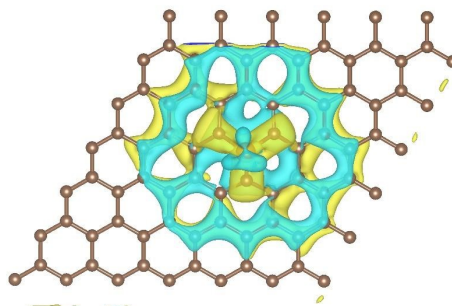

**Gr-Fe3 (+1.01 e on Fe)**

**Figure S1.** The density of states and charge density distribution maps of *Gr-Fe2(3)* and *Gr-Cu1(3)* surfaces

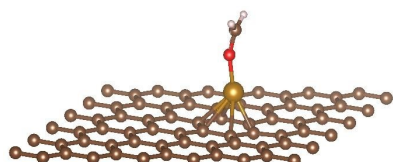

**Gr-Fe1-F(1)**

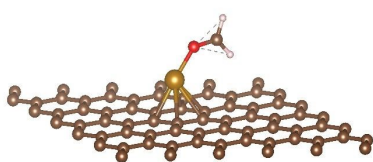

**Gr-Fe1-F(2)**

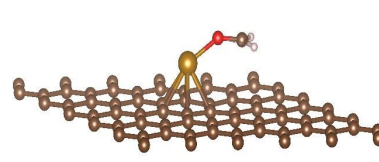

**Gr-Fe1-F(3)**

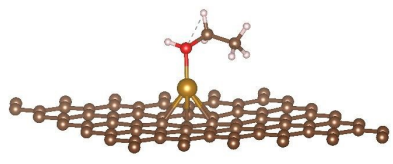

**Gr-Fe1-Et(1)**

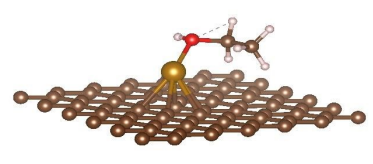

**Gr-Fe1-Et(2)**

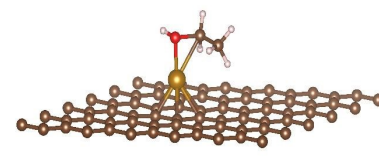

**Gr-Fe1-Et(3)**

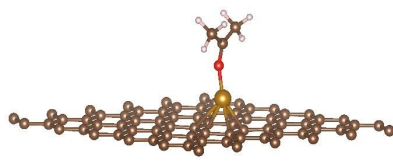

**Gr-Fe1-Ac(1)**

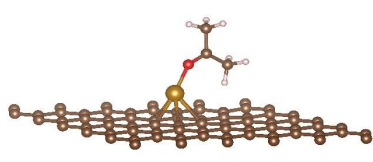

**Gr-Fe1-Ac(2)**

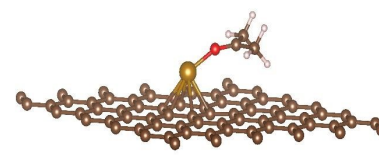

**Gr-Fe1-Ac(3)**

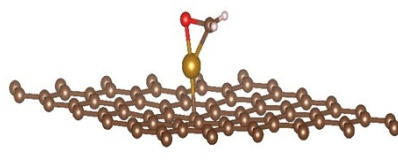

**Gr-Fe2-F(1)**

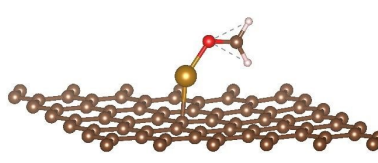

**Gr-Fe2-F(2)**

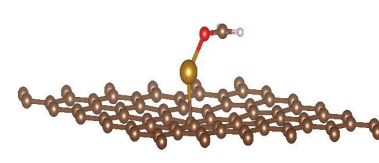

**Gr-Fe2-F(3)**

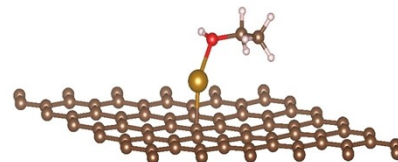

**Gr-Fe2-Et(1)**

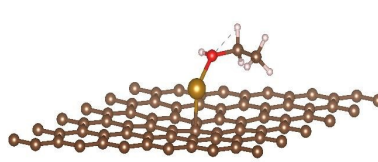

**Gr-Fe2-Et(2)**

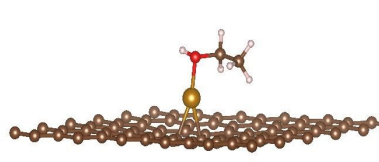

**Gr-Fe2-Et(3)**

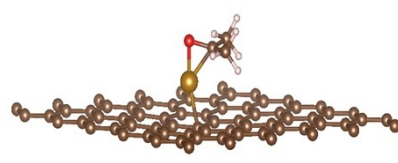

**Gr-Fe2-Ac(1)**

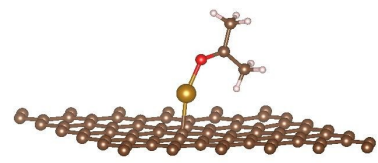

**Gr-Fe2-Ac(2)**

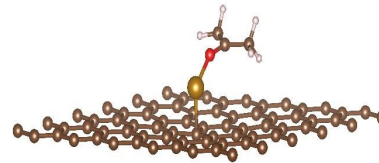

**Gr-Fe2-Ac(3)**

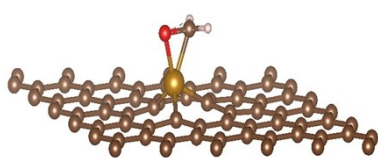

**Gr-Fe3-F(1)**

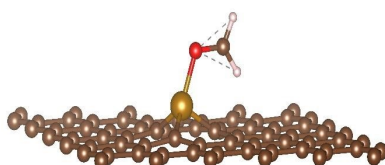

**Gr-Fe3-F(2)**

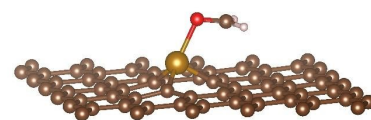

**Gr-Fe3-F(3)**

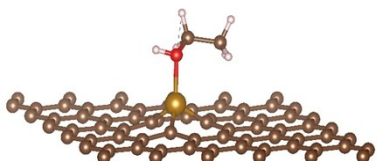

**Gr-Fe3-Et(1)**

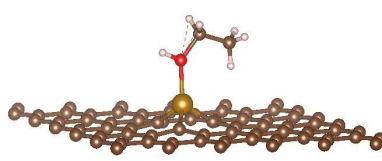

**Gr-Fe3-Et(2)**

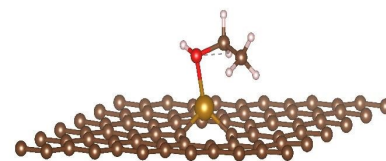

**Gr-Fe3-Et(3)**

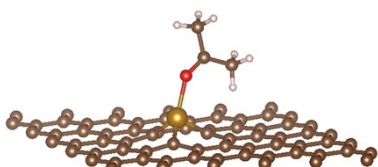

**Gr-Fe3-Ac(1)**

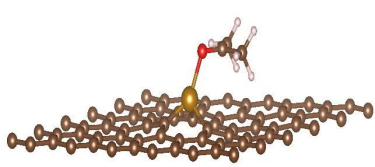

**Gr-Fe3-Ac(2)**

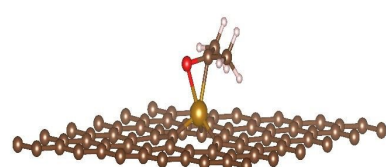

**Gr-Fe3-Ac(3)**

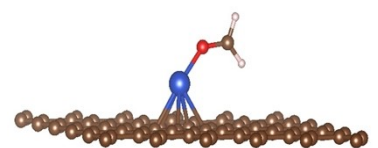

**Gr-Cu1-F(1)**

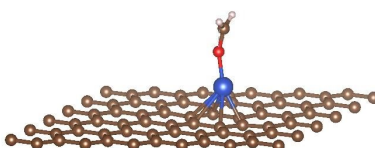

**Gr-Cu1-F(2)**

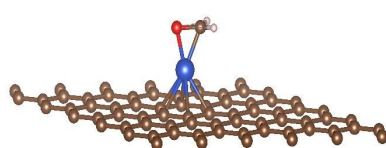

**Gr-Cu1-F(3)**

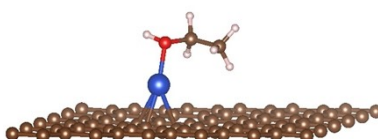

**Gr-Cu1-Et(1)**

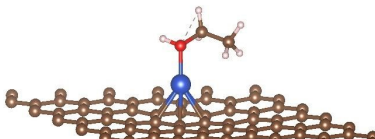

**Gr-Cu1-Et(2)**

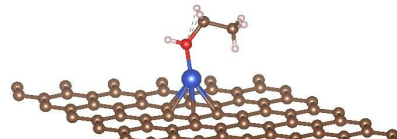

**Gr-Cu1-Et(3)**

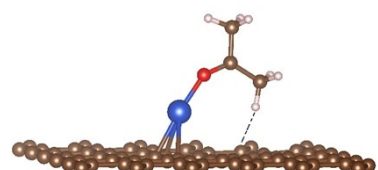

**Gr-Cu1-Ac(1)**

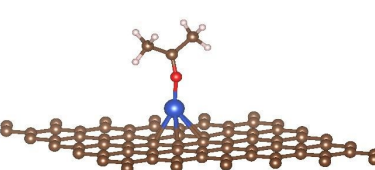

**Gr-Cu1-Ac(2)**

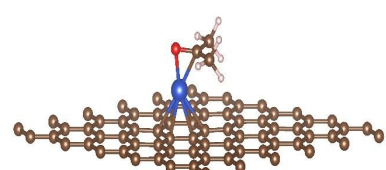

**Gr-Cu1-Ac(3)**

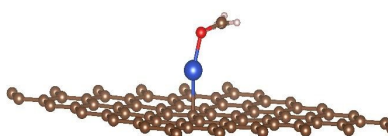

**Gr-Cu2-F(1)**

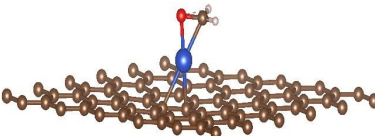

**Gr-Cu2-F(2)**

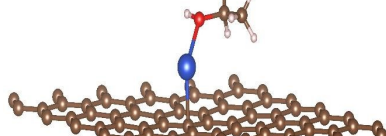

**Gr-Cu2-Et(1)**

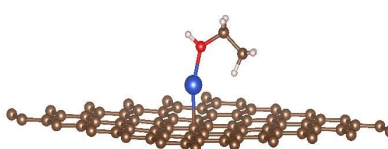

**Gr-Cu2-Et(2)**

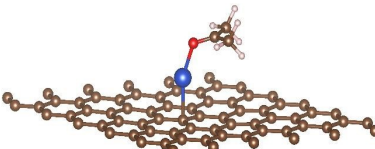

**Gr-Cu2-Ac(1)**

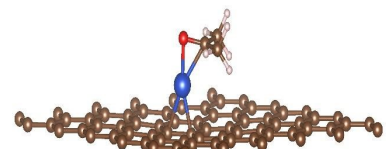

**Gr-Cu2-Ac(2)**

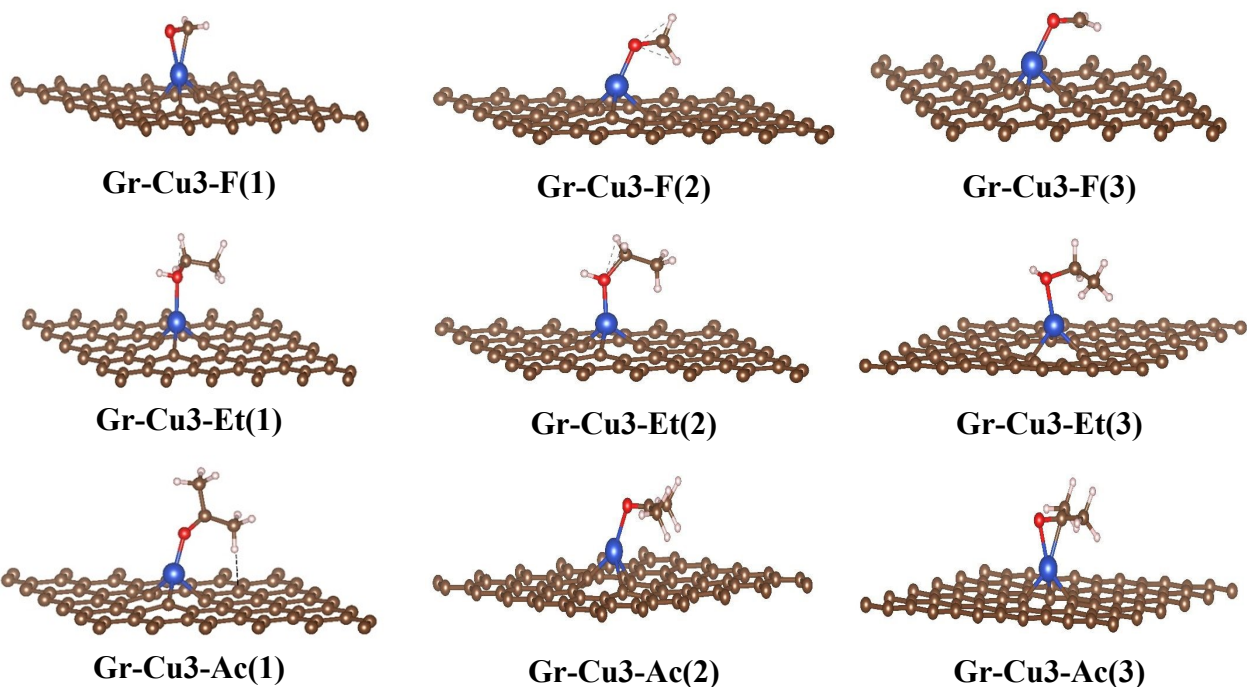

**Figure S2.** The other stable complexes for **Gr-Mi--VOC** systems ( $M = \text{Fe}, \text{Cu}; i = 1, 2, 3; \text{VOC} = \text{F}$  ( $\text{HCHO}$ ),  $\text{Et}$  ( $\text{C}_2\text{H}_5\text{OH}$ ),  $\text{Ac}$  ( $\text{CH}_3\text{COCH}_3$ ))

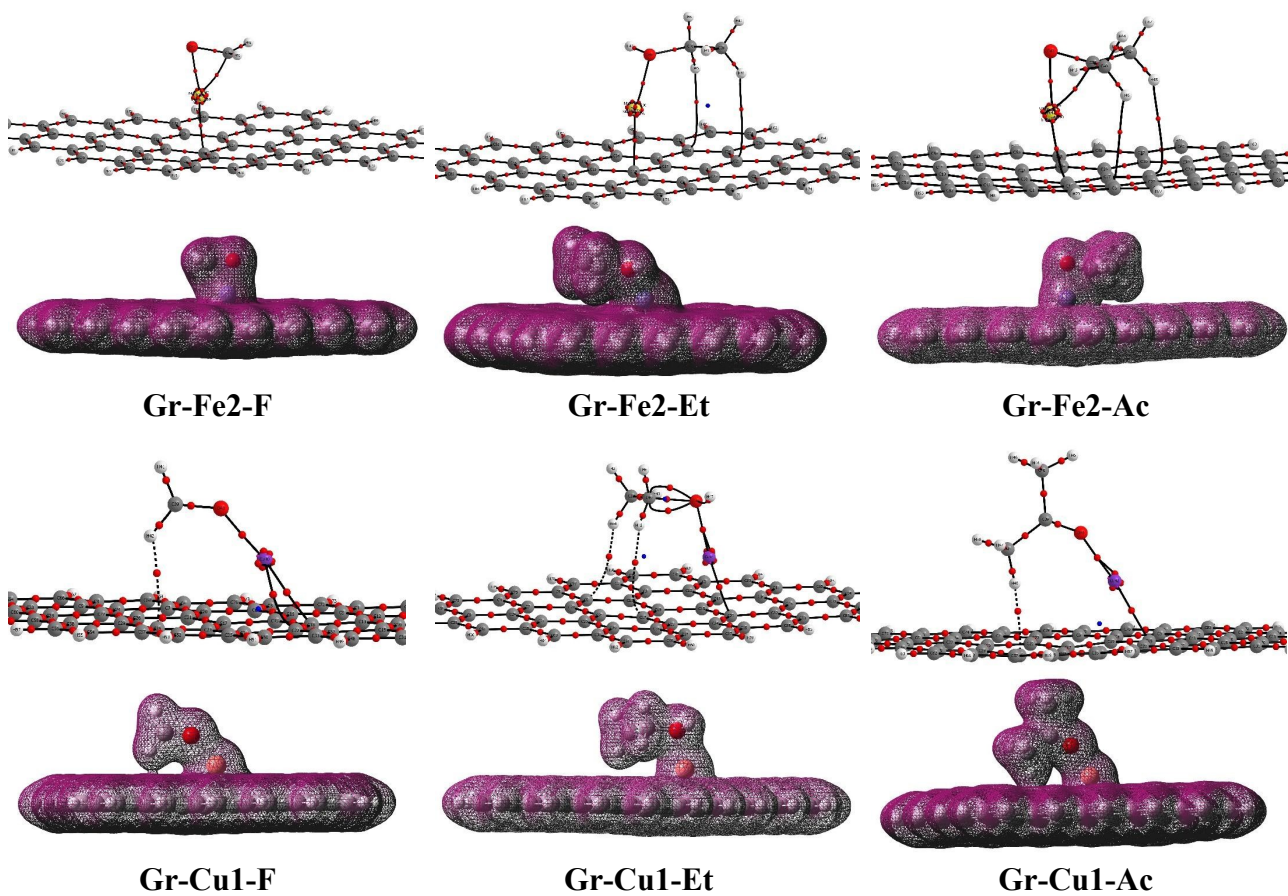

**Figure S3.** The topological geometries and total electron density transfer maps for the selected configurations in **Gr-Fe2/Gr-Cu1--VOC** systems

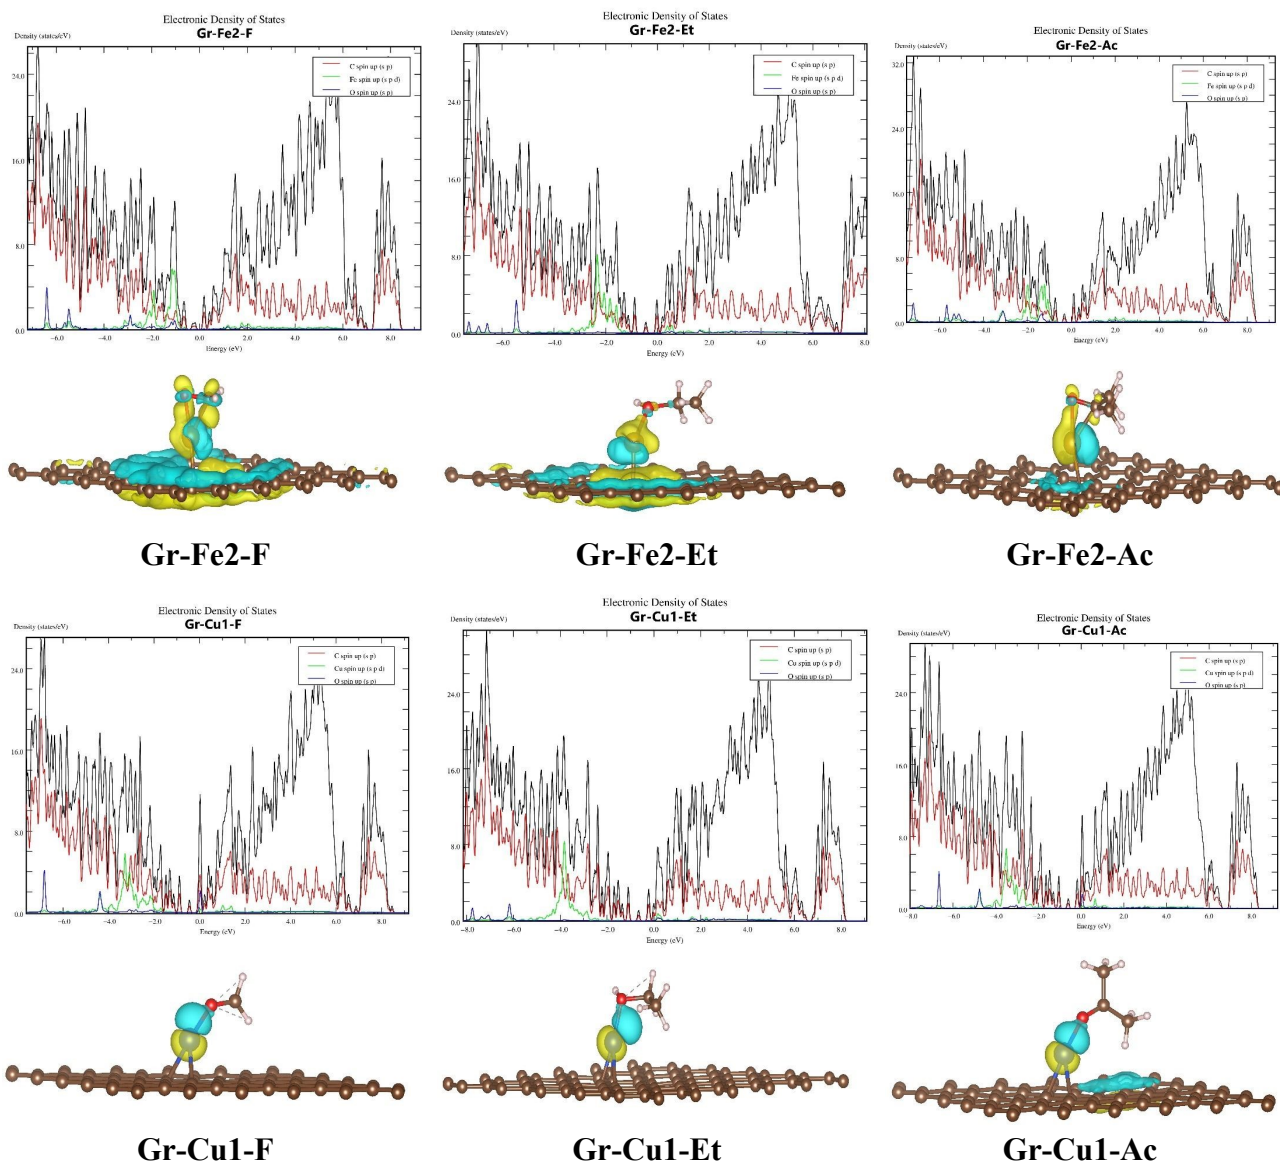

**Figure S4.** The density of states and charge density difference maps of the most stable configurations for *Gr-Fe2*, *Gr-Cu1* surfaces

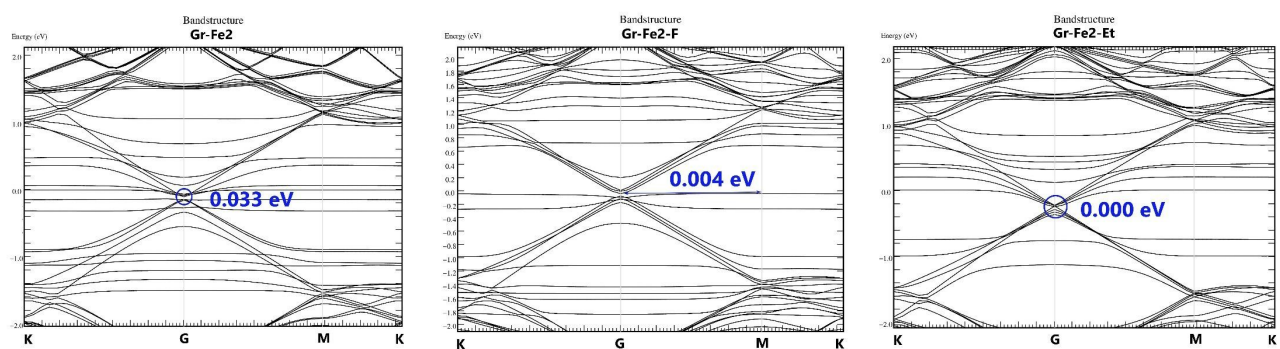

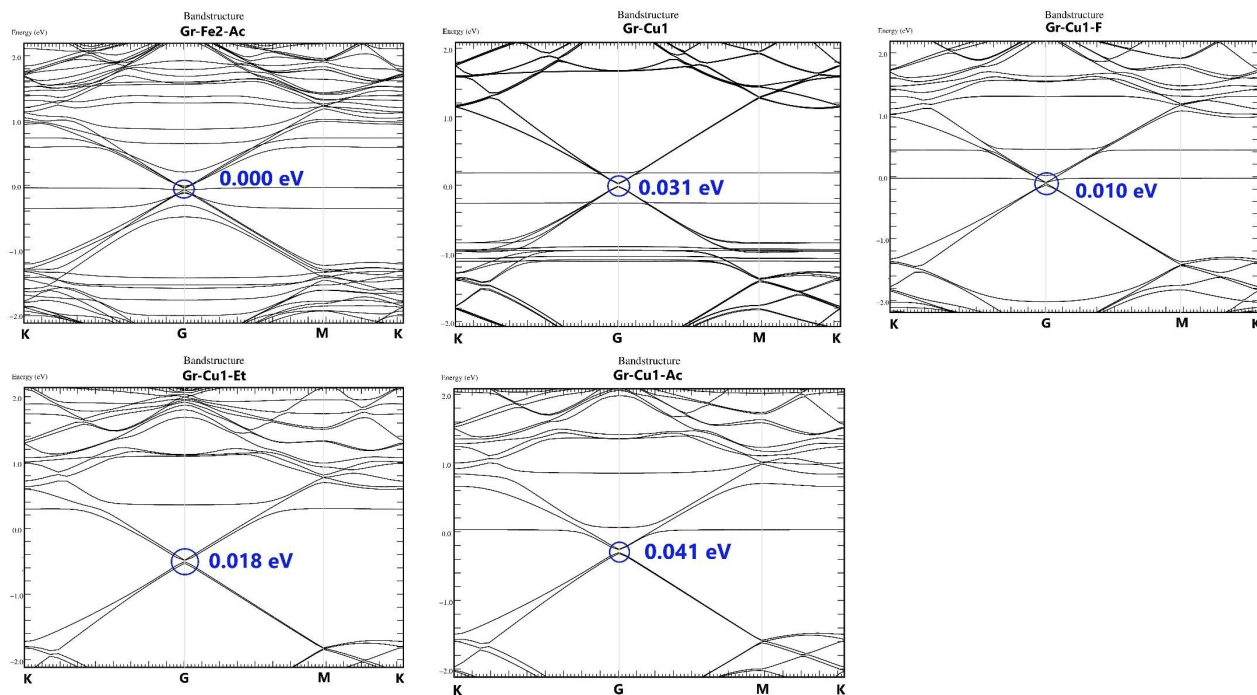

**Figure S5.** The band structures of the most stable configurations in Gr-Fe<sub>2</sub>/Gr-Cu<sub>1</sub>--VOC systems

**Tables:**

**Table S1.** Adsorption energy of the other stable configurations for Fe/Cu-adsorbed graphene surfaces (Fig. S2) at the vdW-DF2 functional (in eV)

|               | HCHO (F-1/2/3)    | C <sub>2</sub> H <sub>5</sub> OH (Et-1/2/3) | CH <sub>3</sub> COCH <sub>3</sub> (Ac-1/2/3) |
|---------------|-------------------|---------------------------------------------|----------------------------------------------|
| <b>Gr-Fe1</b> | -1.59/-1.48/-1.23 | -1.29/-1.23/-0.91                           | -1.48/-1.27/-1.43                            |
| <b>Gr-Fe2</b> | -2.33/-1.80/-1.70 | -1.70/-1.52/-1.32                           | -2.17/-1.82/-1.84                            |
| <b>Gr-Fe3</b> | -1.16/-0.82/-0.65 | -1.21/-1.16/-0.76                           | -1.12/-1.00/-0.68                            |
| <b>Gr-Cu1</b> | -0.70/-0.42/-0.44 | -0.92/-0.69/-0.58                           | -0.82/-0.42/-0.53                            |
| <b>Gr-Cu2</b> | -0.61/-0.58       | -0.71/-0.80                                 | -0.77/-0.71                                  |
| <b>Gr-Cu3</b> | -0.87/-0.87/-0.50 | -0.72/-0.71/-0.49                           | -0.95/-0.79/-0.46                            |

**Table S2.** Selected parameters of AIM and NBO analyses for the stable configurations ( $\rho(r)$ ;  $\nabla^2(\rho(r))$ ,  $H(r)$  in au, EDT in e, WBI-Wiberg bond index)

|                  | BCP          | $\rho(r)$ | $\nabla^2(\rho(r))$ | $H(r)$ | WBI   | EDT    |
|------------------|--------------|-----------|---------------------|--------|-------|--------|
| <b>Gr-Fe2-F</b>  | C...Fe       | 0.100     | 0.251               | -0.028 | 0.842 | 0.088  |
| <b>Gr-Fe2-Et</b> | O...Fe       | 0.118     | 0.590               | -0.042 | 0.842 |        |
|                  | O...Fe       | 0.064     | 0.446               | -0.005 | 0.426 | 0.088  |
| <b>Gr-Fe2-Ac</b> | O...Fe       | 0.116     | 0.565               | -0.041 | 0.755 | 0.216  |
| <b>Gr-Cu1-F</b>  | Cu...O       | 0.081     | 0.830               | -0.005 | 0.210 | -0.162 |
|                  | H...C/ $\pi$ | 0.008     | 0.035               | 0.002  | ---   |        |
| <b>Gr-Cu1-Et</b> | Cu...O       | 0.074     | 0.718               | -0.003 | 0.200 | 0.067  |
|                  | H...C/ $\pi$ | 0.005     | 0.018               | 0.001  | ---   |        |
| <b>Gr-Cu1-Ac</b> | Cu...O       | 0.079     | 0.813               | -0.004 | 0.202 | 0.056  |
|                  | H...C/ $\pi$ | 0.016     | 0.064               | 0.001  | ---   |        |

**Table S3.** The characteristics of gas sensing performance of **Gr-Fe2**, **Gr-Cu1** surfaces

|                  | $E_g$ (eV) | S (%) | $\tau$ (s)           |                      |                      |
|------------------|------------|-------|----------------------|----------------------|----------------------|
|                  |            |       | 298K                 | 400K                 | 500K                 |
| <b>Gr-Fe2-F</b>  | 0.004      | 43.1  | $2.4 \times 10^{27}$ | $2.2 \times 10^{17}$ | $3.0 \times 10^{11}$ |
| <b>Gr-Fe2-Et</b> | 0.000      | 47.4  | $5.5 \times 10^{16}$ | $2.6 \times 10^9$    | $1.3 \times 10^5$    |
| <b>Gr-Fe2-Ac</b> | 0.000      | 47.4  | $4.8 \times 10^{14}$ | $2.1 \times 10^{15}$ | $7.3 \times 10^9$    |
| <b>Gr-Cu1-F</b>  | 0.010      | 33.6  | $9.4 \times 10^{-3}$ | $2.7 \times 10^{-5}$ | $8.8 \times 10^{-7}$ |
| <b>Gr-Cu1-Et</b> | 0.018      | 22.4  | $3.6 \times 10^3$    | 0.4                  | $1.9 \times 10^{-3}$ |
| <b>Gr-Cu1-Ac</b> | 0.041      | 21.5  | 72.8                 | $2.1 \times 10^{-2}$ | $1.8 \times 10^{-4}$ |
